# Supplementary material for: Phagosomal and mitochondrial alterations in RPE may contribute to KCNJ13 retinopathy
Source: Sci Rep. 2019 Mar 7;9:3793. doi: 10.1038/s41598-019-40507-8 (PMC6405871; doi:10.1038/s41598-019-40507-8)
Supplement: Supplementary file 1 — Supplementary Information [file 41598_2019_40507_MOESM1_ESM.pdf]

## Supplementary Information

### **Phagosomal and mitochondrial alterations in RPE may contribute to *KCNJ13* retinopathy**

**Maria Toms<sup>1</sup>, Thomas Burgoyne<sup>1</sup>, Dhani Tracey-White<sup>1</sup>, Rose Richardson<sup>1</sup>,  
Adam M Dubis<sup>1,2</sup>, Andrew R Webster<sup>1,2</sup>, Clare Futter<sup>1</sup>, Mariya Moosajee<sup>1,2,3</sup>**

<sup>1</sup>UCL Institute of Ophthalmology, London, UK.

<sup>2</sup>Moorfields Eye Hospital NHS Foundation Trust, London, UK.

<sup>3</sup>Great Ormond Street Hospital for Children NHS Foundation Trust, London, UK.

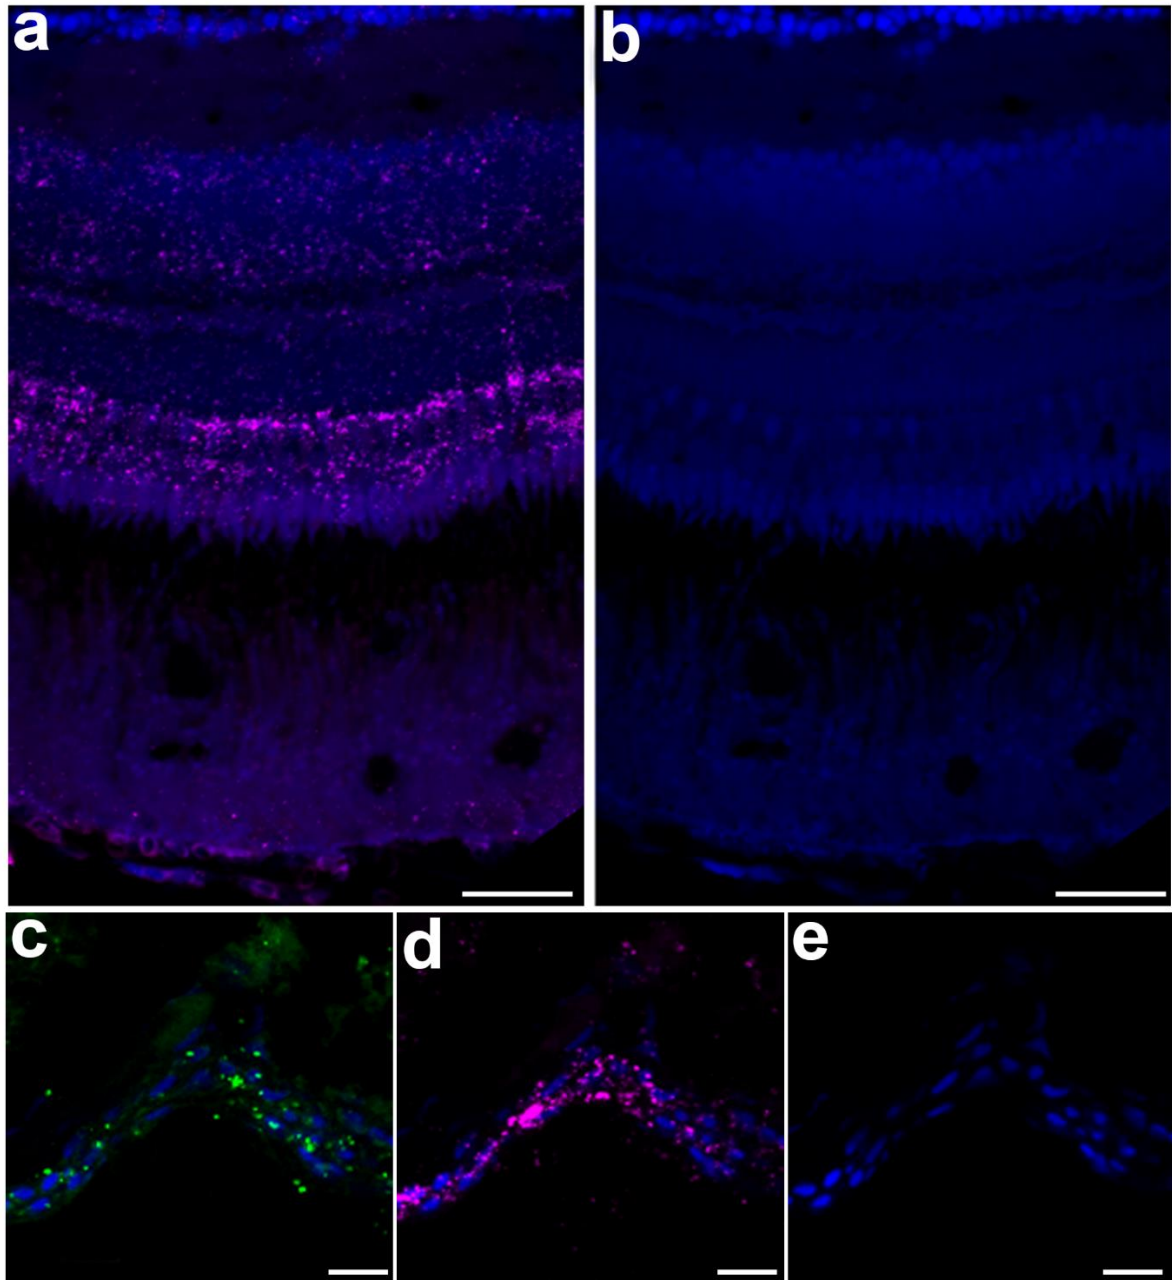

**Supplementary Figure S1. RNAscope *in situ* hybridization positive and negative probes.**

Wild-type adult retinal cryosections with *odc1* positive control probe (magenta) (a) and *dapB* (bacterial gene) negative control probe (b). Wild-type adult tail fin cryosections with *kcnj13* (green) (c), *odc1* (d) and *dapB* (e) probes. Sections are counterstained with DAPI (blue). Scale bars = 25  $\mu$ m (a-b), 10  $\mu$ m (c-e).

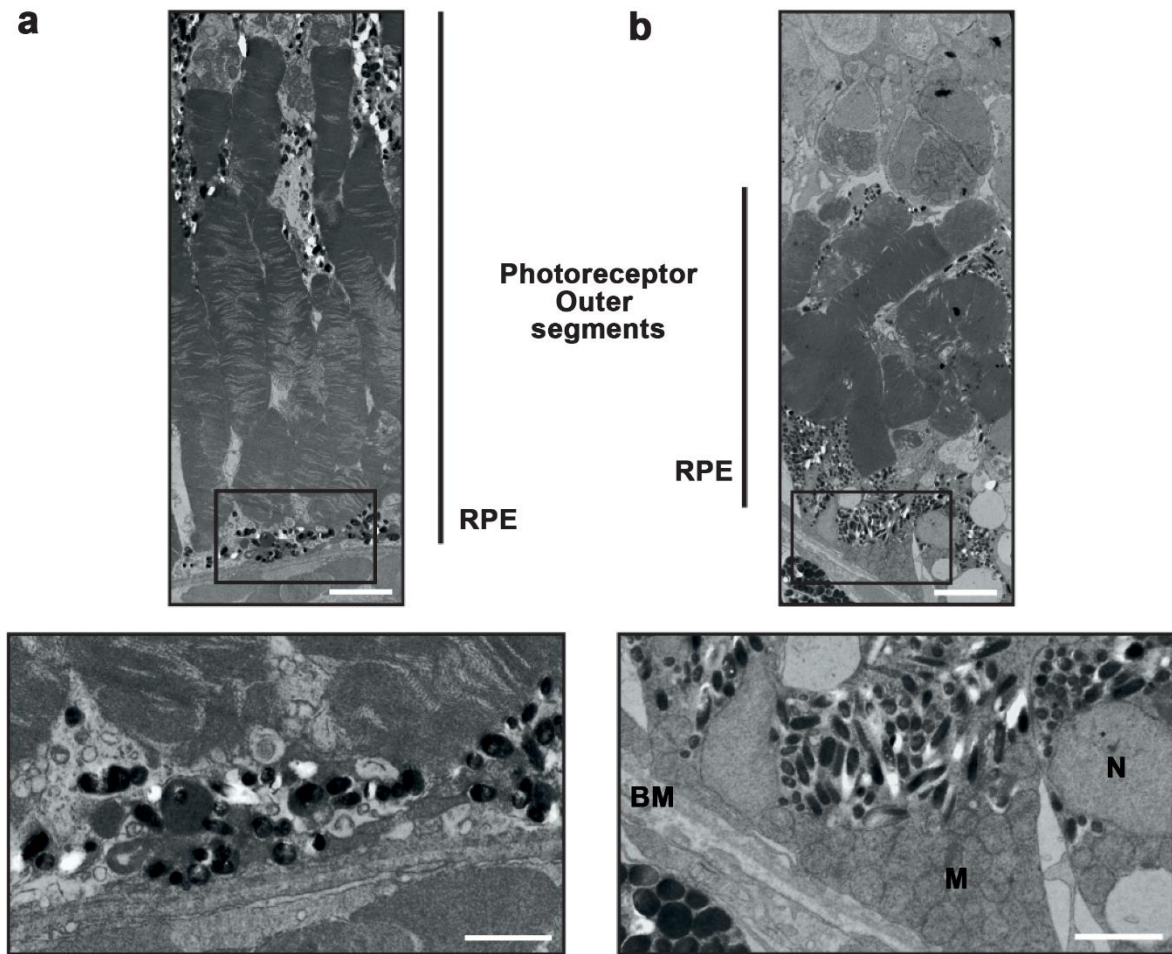

**Supplementary Figure S2. *obe<sup>td15</sup>* zebrafish eyes exhibit areas of photoreceptor loss with islands of preserved retina.**

TEM images (a-b) of the photoreceptor outer segment and retinal pigment epithelium (RPE) from a 12 months post-fertilization *obe<sup>td15</sup>* zebrafish eyes. A region displaying preserved retinal tissue (a) and an affected region (b) with disordered photoreceptor outer segments and numerous, large mitochondria in the RPE. BM, basement membrane; M, mitochondria; N, nucleus. Scale bars = 5  $\mu\text{m}$  and 2  $\mu\text{m}$ .

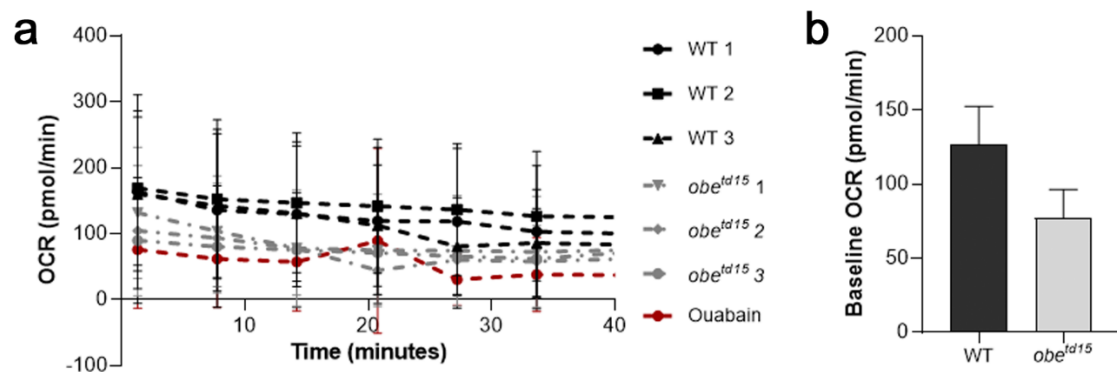

**Supplementary Figure S3. Measurement of mitochondrial function using Seahorse XF analysis.**

(a) Oxygen consumption rate (OCR) of 6 months post fertilization wild-type, *obe<sup>td15</sup>* and ouabain-injected (4 days post injection) retinal samples (0.75 mm punch biopsies).  $n=6$  per fish (3 punches taken per retina), mean  $\pm$ SD. Baseline OCR is plotted on bar chart (b),  $p=0.0558$ .  $n=3$ , mean  $\pm$ SD.

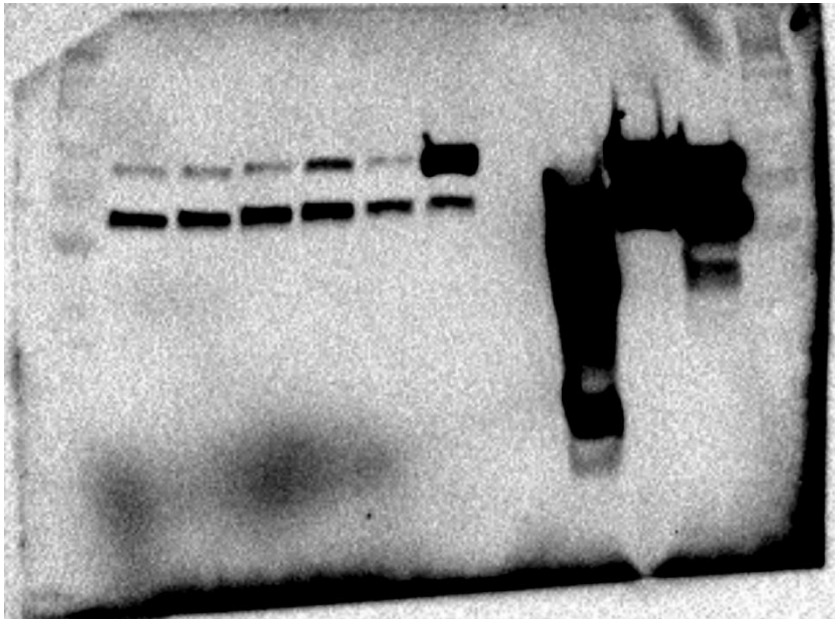

**Supplementary Figure S4. Uncropped Western blot for hsp60**
